# Supplementary material
Source: PubMed Central journal article supplement (PMC4278243)

## Supplement Figure 1.

Placement of the MATS for Cell Migration Analysis.

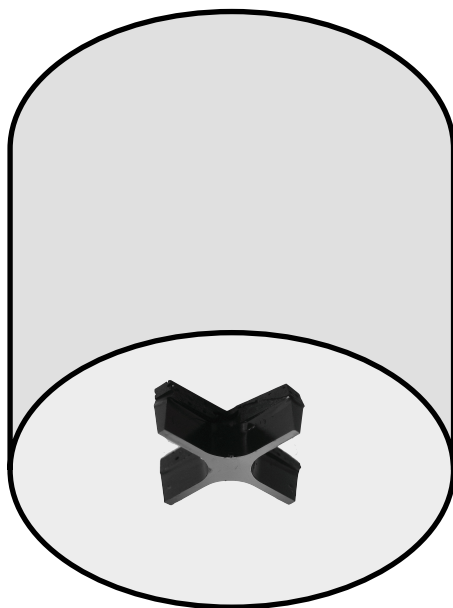

Supplement: mmc1.pdf [file mmc1.pdf]

## Supplement Figure 2.

A

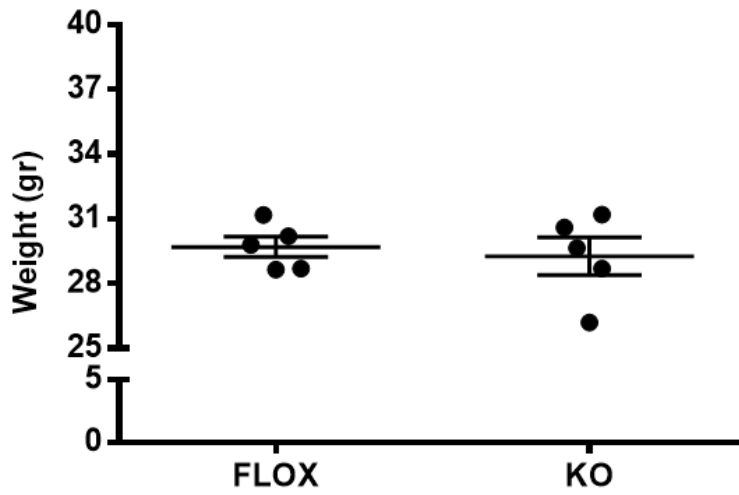

B

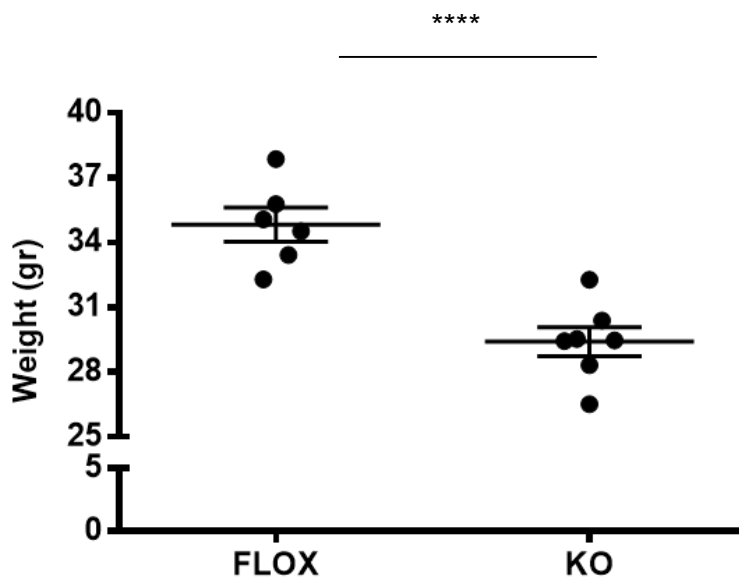

Supplement: mmc2.pdf [file mmc2.pdf]

**Supplement Figure 3.**

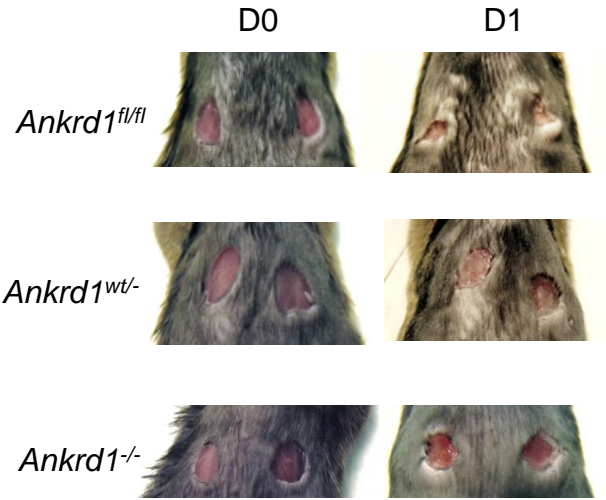

Supplement: mmc3.pdf [file mmc3.pdf]

# Supplement Figure 4.

## A

### Males

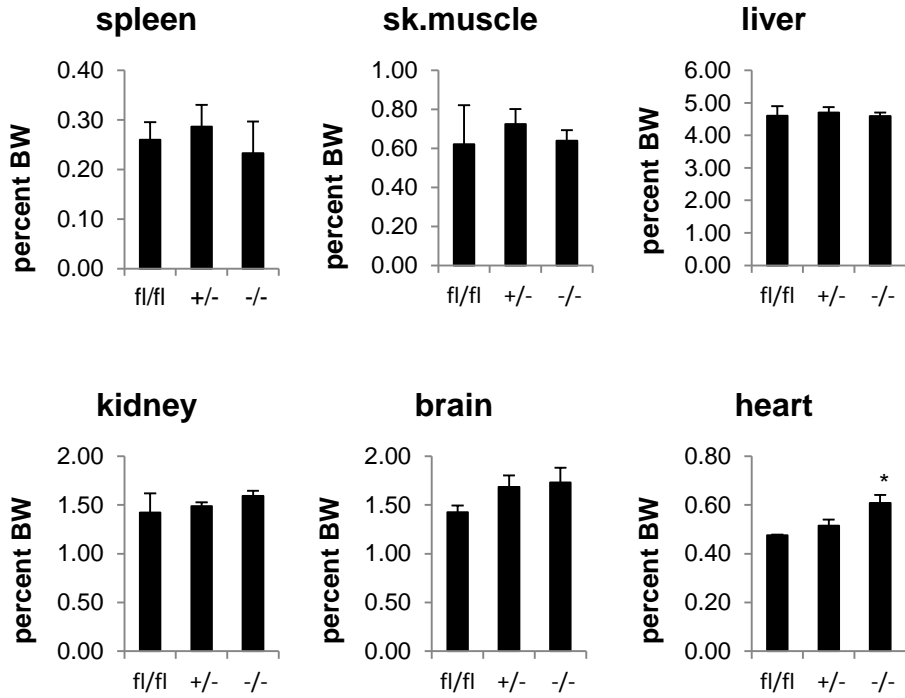

## B

### Females

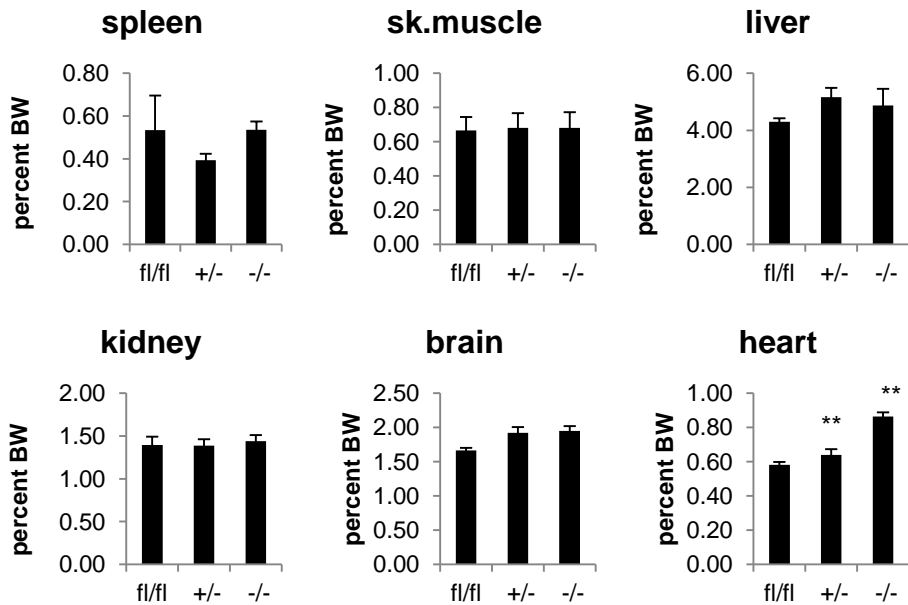

Supplement: mmc4.pdf [file mmc4.pdf]

## Supplement Figure 5.

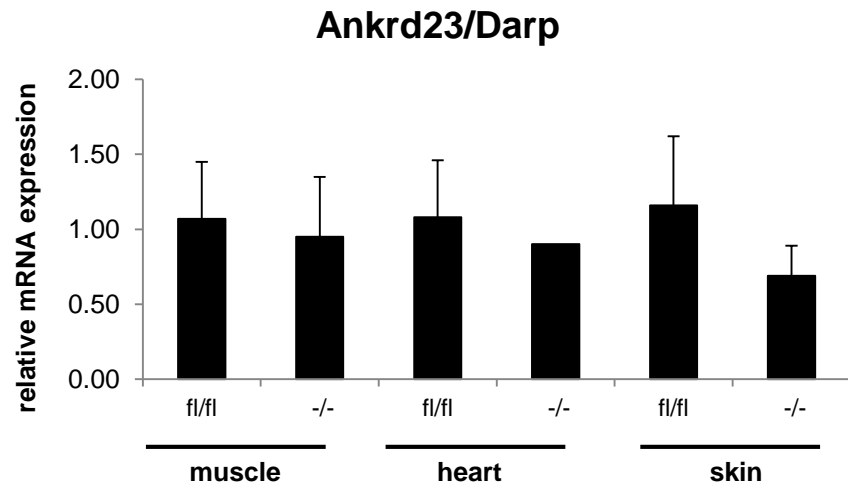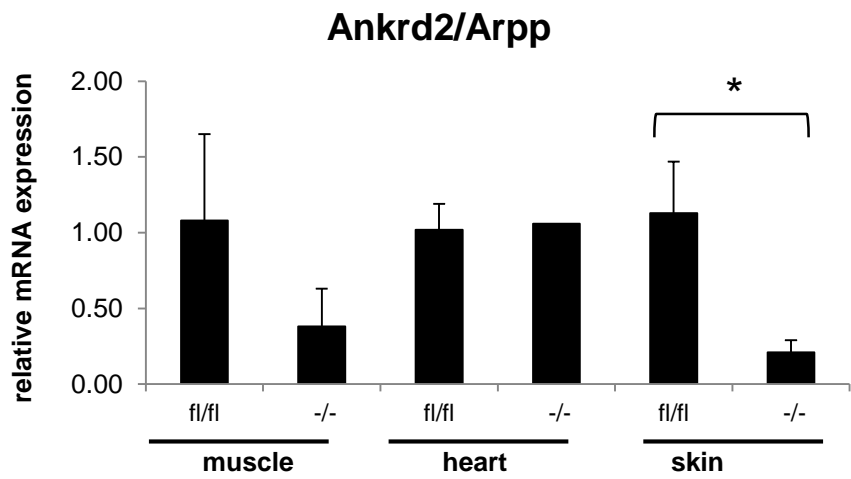

Supplement: mmc5.pdf [file mmc5.pdf]

Supplement. Figure 6.

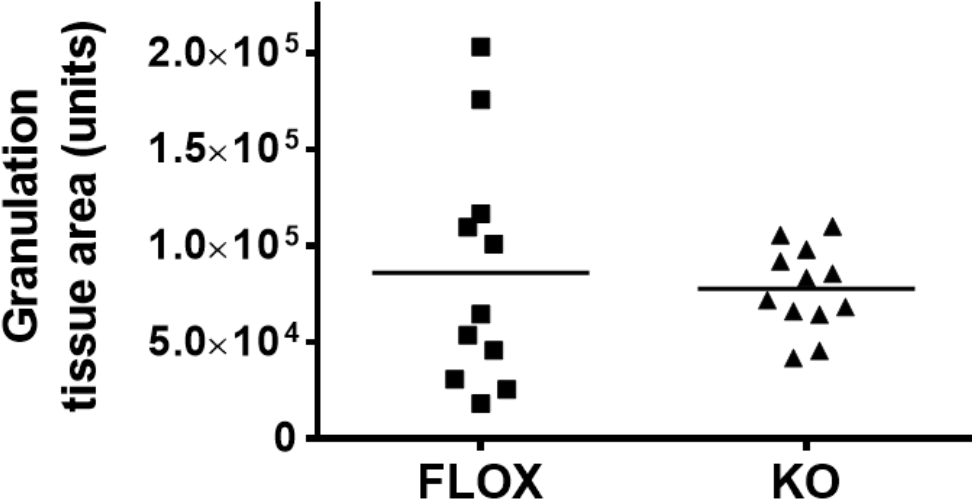

Supplement: mmc6.pdf [file mmc6.pdf]

**Supplement Figure 7.**

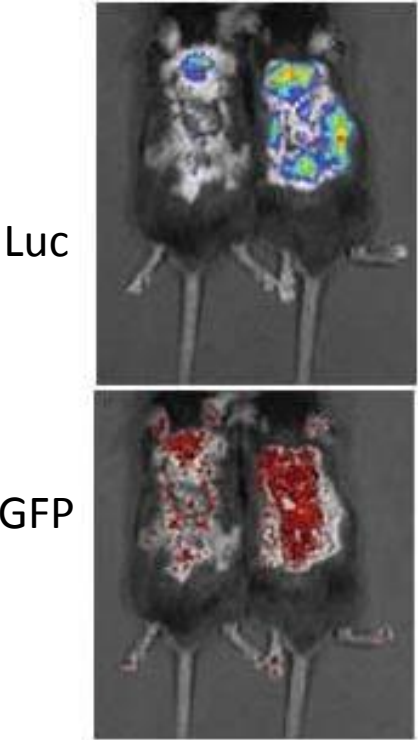

Supplement: mmc7.pdf [file mmc7.pdf]

**Supplement Figure 8.**

FLOX

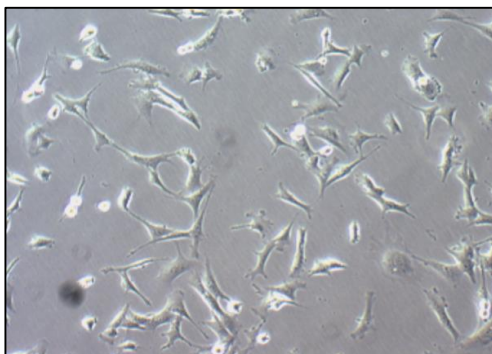

KO

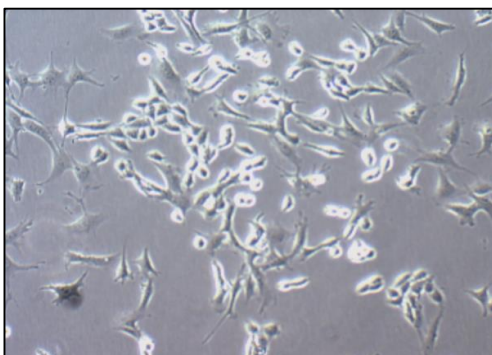

Supplement: mmc8.pdf [file mmc8.pdf]

Supplement Figure 9.

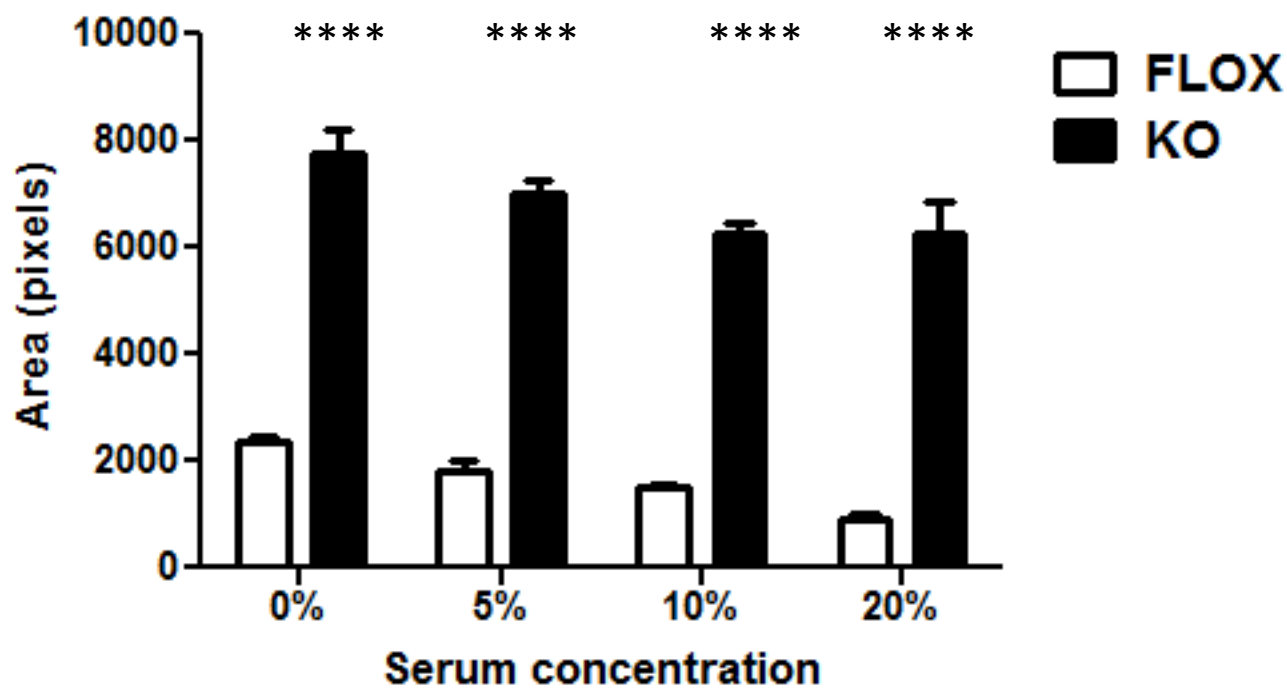

Supplement: mmc9.pdf [file mmc9.pdf]
